# Supplementary material for: Influence of surfactant alkyl length in functionalizing sol–gel derived microporous cobalt oxide silica
Source: Royal Society of Chemistry journal article supplement (doi:10.1039/c4ra05934d), 2014-01-01
Supplement: c4ra05934d1.pdf [file c4ra05934d1.pdf]

# 1 Influence of surfactant alkyl length in functionalizing 2 sol-gel derived microporous cobalt oxide silica

3

4 Gianni Olguin<sup>1,2</sup>, Christelle Yacou<sup>1</sup>, Simon Smart<sup>1,\*</sup>, João C. Diniz da Costa<sup>1</sup>

5 <sup>1</sup>The University of Queensland, FIMLab - Films and Inorganic Membrane Laboratory, School of  
6 Chemical Engineering, Brisbane, Qld, 4072, Australia

7 <sup>2</sup>Pontificia Universidad Católica de Valparaíso, Escuela de Ingeniería Química, Valparaíso, Chile

8 (\*) corresponding author (s.smart@uq.edu.au)

## 9 Supplementary Information

10

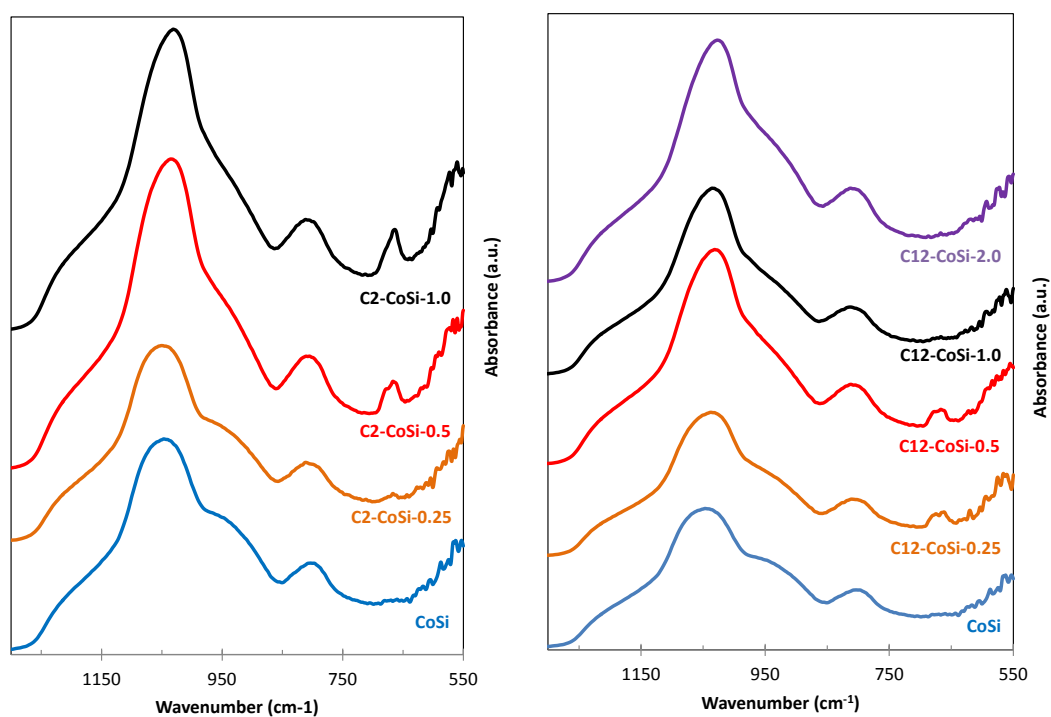

11

1 Figure S1: FTIR normalized spectra of calcined xerogels as a function of surfactant concentration. Left: C2-AB.  
 2 Right: C12-AB. The alteration of the  $\text{Co}_3\text{O}_4$  characteristic peak at  $667\text{ cm}^{-1}$  ( $\text{Co}^{3+}\text{-O}$  vibration) can be observed as  
 3 surfactant load increases.

4

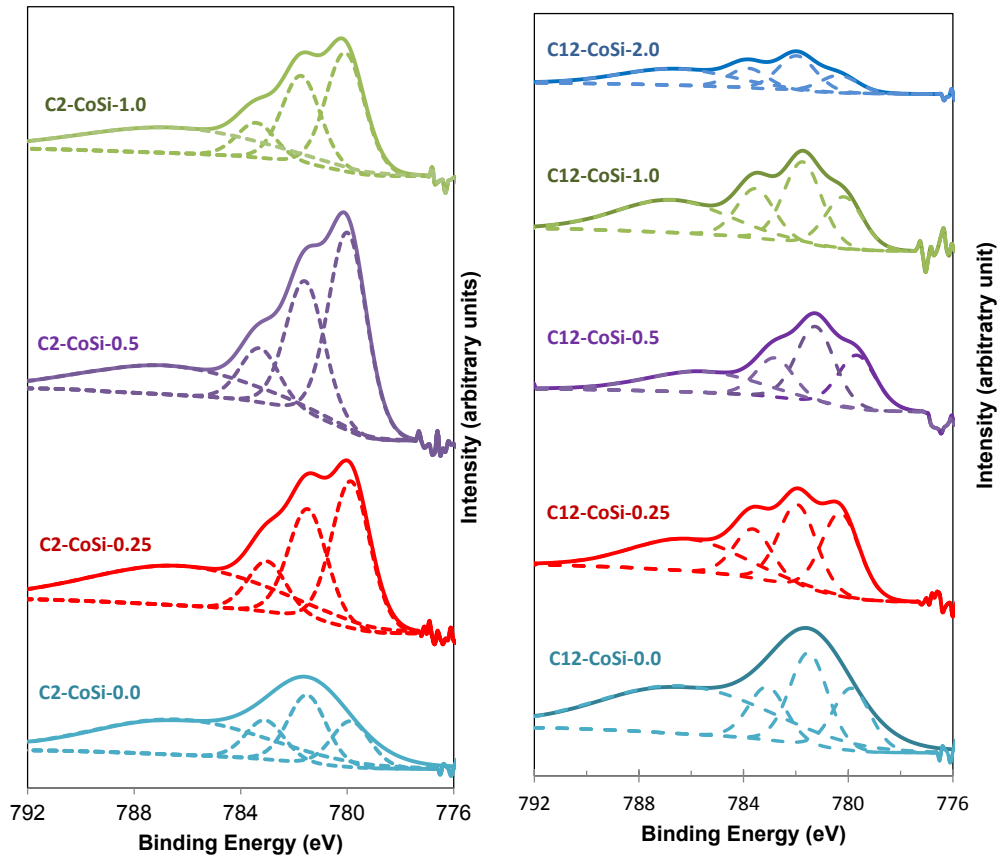

5

6 Figure S2: Evolution of XPS spectra near  $\text{Co}2\text{p}$  region for calcined xerogels as function of surfactant  
 7 concentration. Left: C2-AB. Right: C12-AB. The alteration of the characteristic low energy peak at  $779.9\text{ eV}$   
 8 which is connected with a high valence state of cobalt, can be observed as surfactant load increases.

9

10 Table S1: XPS peak deconvolution data. Peaks position (eV), width, area and goodness of fit for each sample  
 11 displayed in Figure S2.

| Sample        | $\text{Co}^{+3}$ ( $2\text{p}_{3/2}$ )<br>(fwhm 1.7 eV) |        | $\text{Co}^{+2}$ ( $2\text{p}_{3/2}$ )<br>(fwhm 1.7 eV) |        | $\text{Co}^{+2}$ ( $2\text{p}_{3/2}$ )<br>(fwhm 1.7 eV) |       | Satellite ( $2\text{p}_{3/2}$ )<br>(fwhm 5-8 eV) |        | Chi square<br>STD<br>residual |
|---------------|---------------------------------------------------------|--------|---------------------------------------------------------|--------|---------------------------------------------------------|-------|--------------------------------------------------|--------|-------------------------------|
|               | Position                                                | Area   | Position                                                | Area   | Position                                                | Area  | Position                                         | Area   |                               |
| CoSi          | 779.9                                                   | 757.5  | 781.6                                                   | 1126.3 | 783.2                                                   | 644.7 | 786.4                                            | 2619.6 | 0.804                         |
| C2-CoSi-0.25  | 779.9                                                   | 2420.6 | 781.5                                                   | 1808   | 783.1                                                   | 831.2 | 786.3                                            | 3070   | 0.969                         |
| C2-CoSi-0.5   | 779.9                                                   | 3263.4 | 781.6                                                   | 2181.8 | 783.3                                                   | 891.1 | 786.8                                            | 2025   | 0.892                         |
| C2-CoSi-1.0   | 780.0                                                   | 1957.8 | 781.7                                                   | 1441.8 | 783.4                                                   | 571.3 | 786.6                                            | 1987   | 0.756                         |
| C12-CoSi-0.25 | 780.1                                                   | 265.4  | 781.8                                                   | 260.6  | 783.5                                                   | 155.8 | 785.3                                            | 375.1  | 0.795                         |
| C12-CoSi-0.5  | 779.7                                                   | 170.4  | 781.3                                                   | 242.7  | 782.9                                                   | 124.1 | 785.5                                            | 195.5  | 0.864                         |
| C12-CoSi-1.0  | 780.1                                                   | 632.5  | 781.7                                                   | 996    | 783.5                                                   | 601.8 | 786.76                                           | 1171.6 | 0.907                         |
| C12-CoSi-2.0  | 780.1                                                   | 55.4   | 781.8                                                   | 110.4  | 783.5                                                   | 62.15 | 786.4                                            | 40.3   | 0.796                         |

12

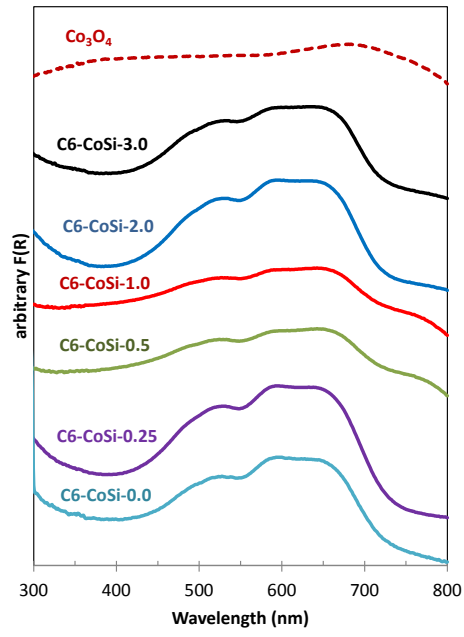

1

2 Figure S3: DR-UV Visible spectrum as function of surfactant load for the calcined C6-AB samples and pure  
3  $\text{Co}_3\text{O}_4$ .

4
